# Supplementary material for: IL-7R blockade reduces post-myocardial infarction-induced atherosclerotic plaque inflammation in ApoE−/- mice
Source: PubMed Central journal article supplement — Biochem Biophys Rep. 2019 May 13;19:100647. doi: 10.1016/j.bbrep.2019.100647 (PMC6517313; doi:10.1016/j.bbrep.2019.100647), 2019-05-13
Supplement: mmc2.pdf [file mmc2.pdf]

IL-7R Blockade Reduces Post-Myocardial Infarction-Induced Atherosclerotic Plaque  
Inflammation in ApoE(-/-) Mice

Mihailovic et al

SUPPLEMENTARY MATERIAL

### Antibodies Used

| Antigen                          | Vendor or Source             | Catalog #  | Working concentration |
|----------------------------------|------------------------------|------------|-----------------------|
| MOMA-2                           | BioRad                       | MCA519G    | 1:50                  |
| CD3                              | Biologend                    | 100202     | 1:50                  |
| Ly6G                             | Biologend                    | 127602     | 1:50                  |
| CD3 BUV 395                      | BD Horizon                   | 563565     | 1:100                 |
| CD11c AlexFluor 700              | eBioscience                  | 56-0114-80 | 1:100                 |
| CD11b APC-eF780                  | eBioscience                  | 47-0112-82 | 1:100                 |
| F4/80 APC                        | Biologend                    | 123115     | 1:100                 |
| Ly6G FITC                        | eBioscience                  | 53-5931-82 | 1:100                 |
| Ly6C eFlour 450                  | eBioscience                  | 48-5932-80 | 1:100                 |
| CD127 PE                         | eBioscience                  | 12-1271-81 | 1:100                 |
| IL-7                             | Boster Biological Technology | PA1467     | 1:50                  |
| IL-7R $\alpha$ blocking antibody | BioXCell                     | BE0065     | See Methods           |



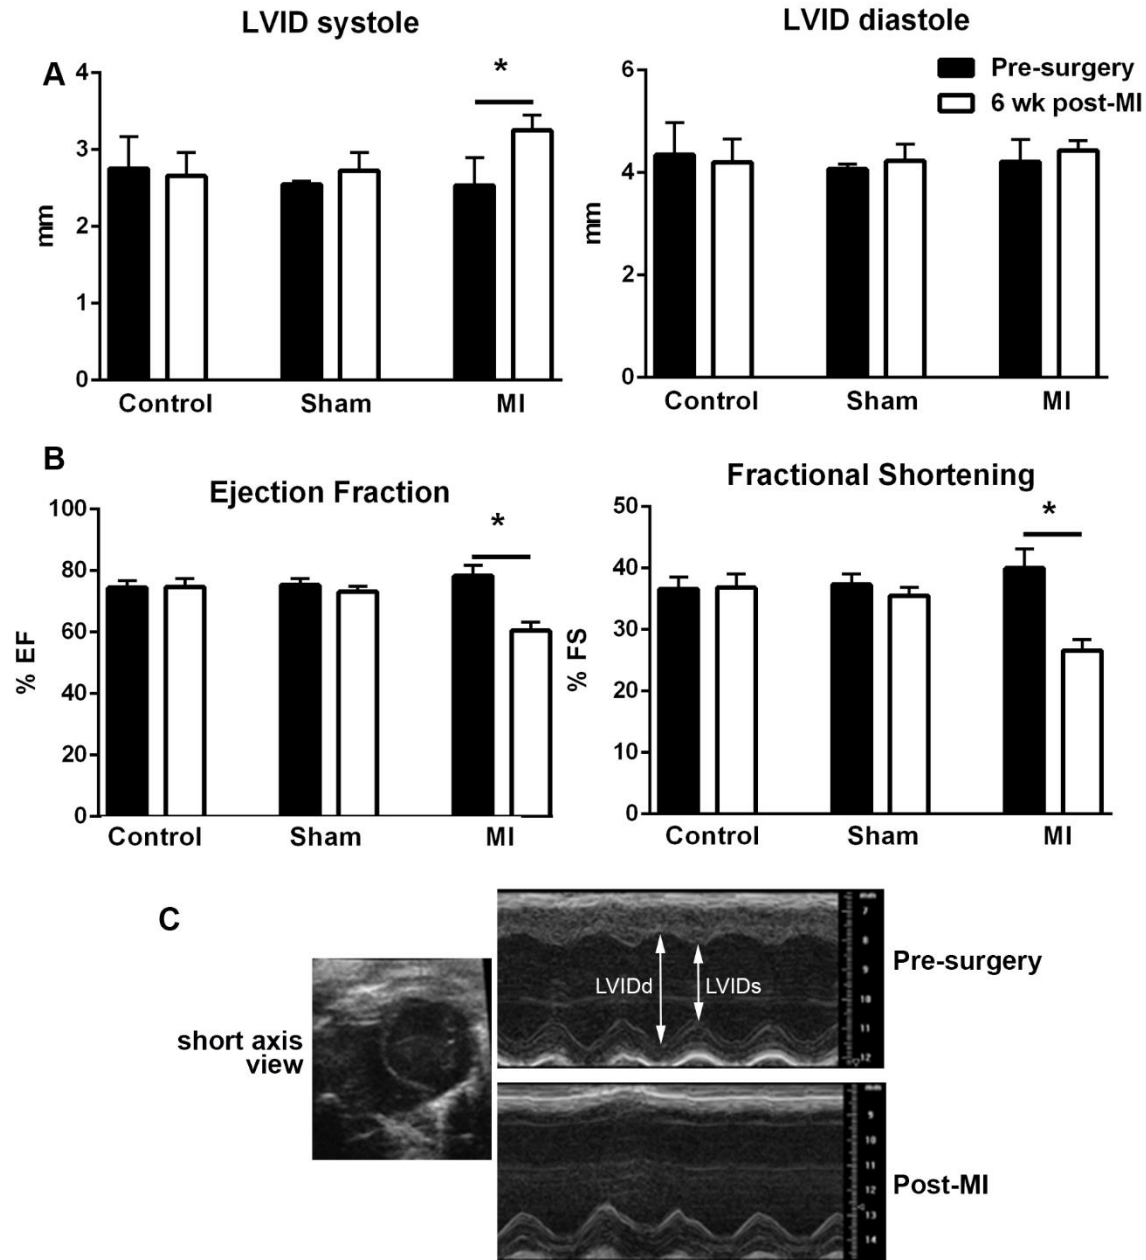

### Supplemental Figure 1: Cardiac function of ApoE<sup>-/-</sup> mice subjected to MI.

ApoE<sup>-/-</sup> mice fed high fat diet for 6 weeks were subjected to surgical MI. Echocardiographic measurements of left ventricular internal dimension (LVID) at systole (A, left panel) and diastole (A, right panel). Ejection fraction (B, left panel) and fractional shortening (B, right panel) in mice. Representative echocardiography image (C) depicting measurement of LVID at diastole (LVIDd) and systole (LVIDs). Control and Sham N=4 each; MI N=5; LVID systole \* $p=0.01$  t-test; ejection fraction \* $p<0.0001$ ; fractional shortening \* $p<0.0001$ .

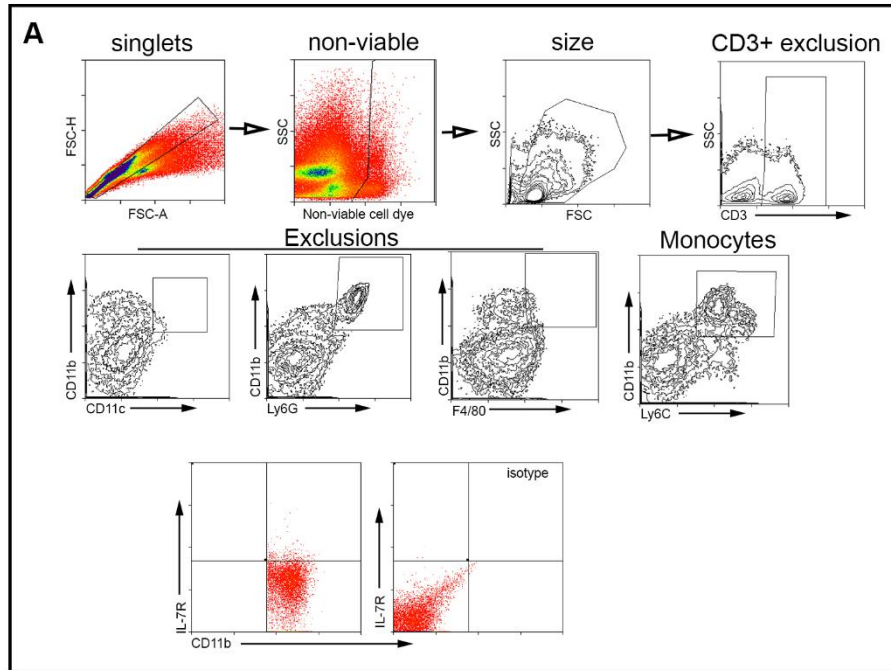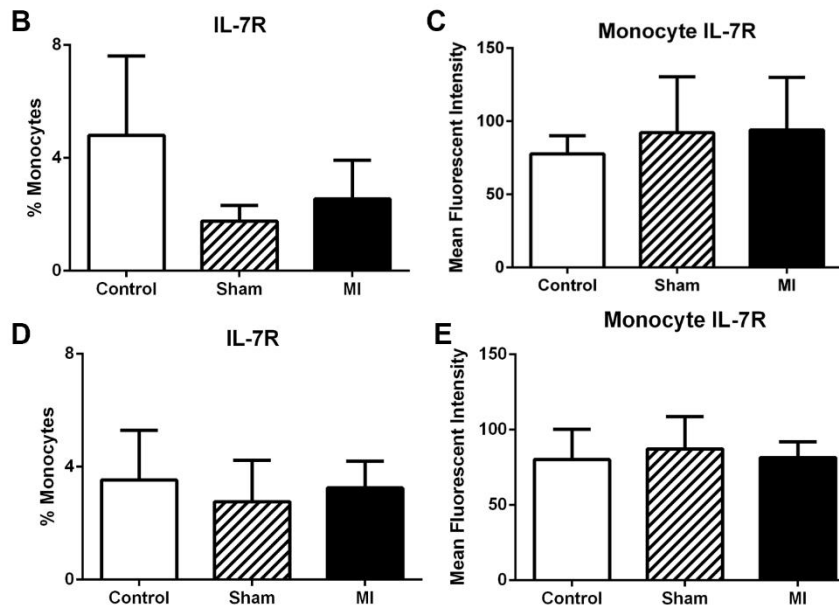

**Supplemental Figure 2: Monocyte expression of IL-7R post-MI.**

Gating strategy for analysis of monocytes from splenocytes (A). Cell singlets and viable cells were size gated and CD3+ T cells excluded. CD11b+Ly6C+ monocytes excluded CD11c, Ly6G, and F4/80 were analyzed for IL-7R expression. Splenocytes from mice 1 week (B and C) or 6 weeks (D and E) post-MI showing percentage of IL-7R+ cells as well as IL-7R expression level by mean fluorescent intensity. N=4-5 each group.

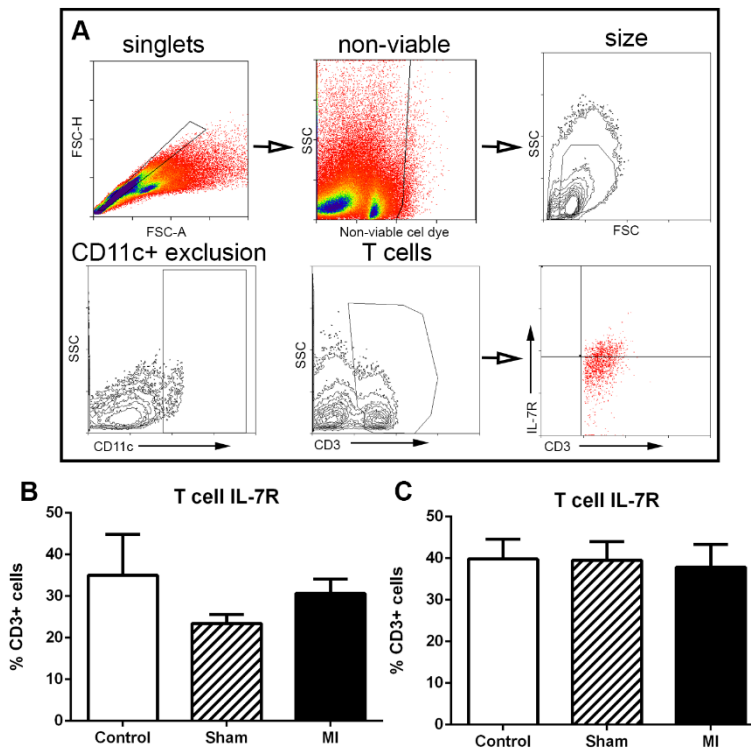

### Supplemental Figure 3: T cell expression of IL-7R post-MI.

Gating strategy for analysis of T cells from splenocytes (A). Cell singlets and viable cells were size gated and CD3+ cells analyzed after excluding CD11c+ cells. Percentage of IL-7R+ T cells 1 week (B) and 6 weeks (C) post-MI. N=4-5 each.

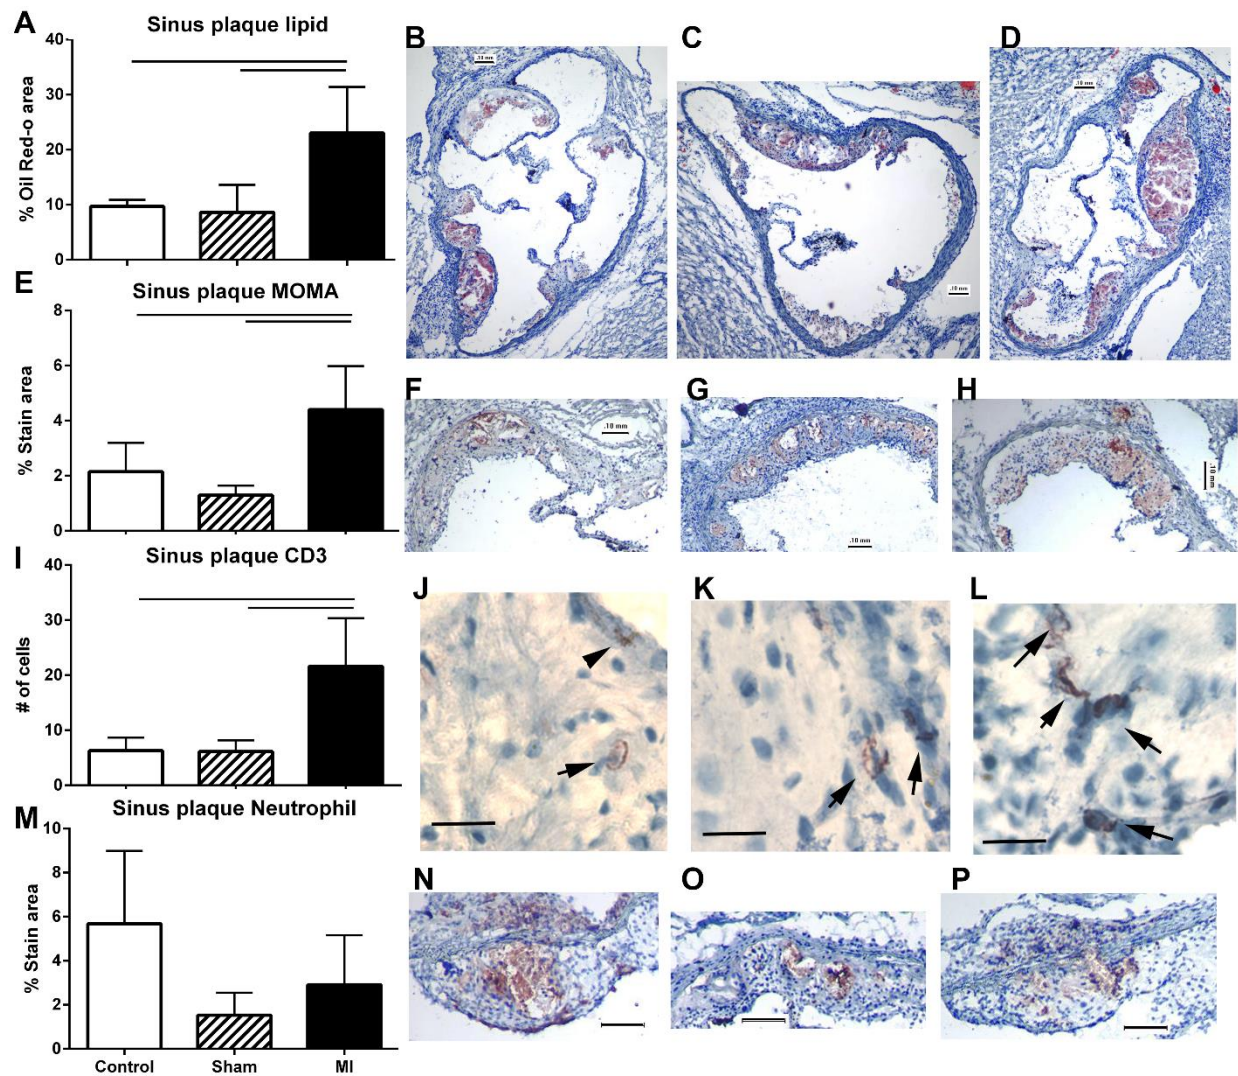

#### Supplemental Figure 4: Plaque inflammation post-MI.

Aortic sinus plaque lipid (A-D), macrophage (E-H), T cells (I-L), and neutrophils (M-P) were stained using oil-red-o, MOMA-2 antibody, CD3 antibody, and Ly6G antibody, respectively. Representative photos from: Non-surgical control (B, F, J, N; N=4); sham (C, G, K, O; N=4), and MI mice (D, H, L, P; N=5). Scale bar=0.1mm, except J-L (scale bar=0.02mm). Bar over columns indicate statistical significance. Sinus plaque lipid: Control vs MI  $p=0.02$ ; Sham vs MI  $p=0.01$ . Sinus plaque MOMA: Control vs MI  $p=0.03$ ; Sham vs MI  $p=0.003$ . Sinus plaque CD3: Control vs MI  $p=0.007$ ; Sham vs MI  $p=0.007$ .
